# Supplementary material
Source: Springer Nature journal article supplement (https://www.springermedizin.de/resource/supplementary/12955_2005_230_MOESM2_ESM.pdf/9559950)

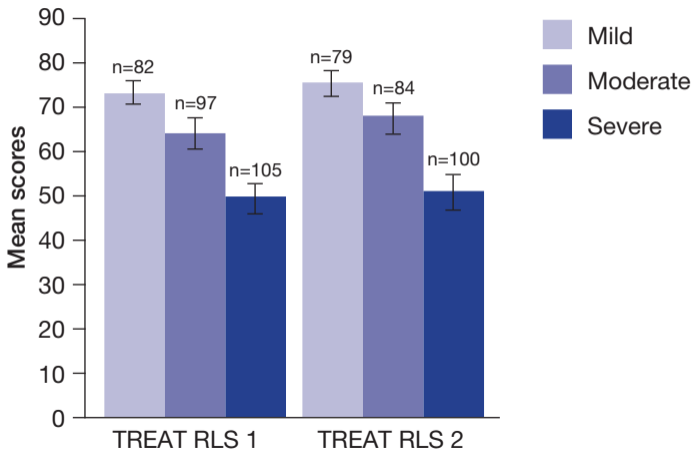

Supplement: MOESM2 [file 9559950]
